# Supplementary material for: Mitochondrial-encoded membrane protein transcripts are pyrimidine-rich while soluble protein transcripts and ribosomal RNA are purine-rich
Source: Springer Nature journal article supplement (doi:10.1186/1471-2164-6-136), 2005-09-26
Supplement: Additional file 1 [file 1471-2164-6-136-s1.pdf]

Addition file 1

for

**Mitochondrial-encoded membrane protein transcripts are pyrimidine-rich while soluble protein transcripts and ribosomal RNA are purine-rich**

By Patrick C. Bradshaw, Anand Rathi, and David C. Samuels

| Species                                        | Genome           |      | RNA-Coding     |        |        |      |      |      |      |      |
|------------------------------------------------|------------------|------|----------------|--------|--------|------|------|------|------|------|
|                                                | %Pur             | %AT  | %Pur           | %Pyrim | Length | %A   | %G   | %C   | %T   | %AT  |
| <i>Homo sapiens</i> (Human)                    | 44               | 55.5 | 51.9           | 48.1   | 4024   | 33.3 | 18.7 | 23.1 | 25   | 58.3 |
| <i>Mus musculus</i> (Mouse)                    | 45.3             | 62.9 | 53.5           | 46.5   | 4038   | 36.7 | 16.9 | 18.2 | 28.3 | 65   |
| <i>Gallus gallus</i> (Chicken)                 | 43.8             | 54   | 51.2           | 48.8   | 4200   | 31.8 | 19.4 | 25.8 | 23   | 54.8 |
| <i>Alligator mississippiensis</i> (Alligator)  | 44.8             | 57   | 52.7           | 47.3   | 4158   | 33   | 19.6 | 24.3 | 23   | 56.1 |
| <i>Xenopus laevis</i> (African clawed frog)    | 46.6             | 63   | 52.8           | 47.2   | 3988   | 32.8 | 20   | 21.5 | 25.6 | 58.5 |
| <i>Danio rerio</i> (Zebrafish)                 | 46               | 60.7 | 54.6           | 45.4   | 4197   | 33.3 | 21.3 | 22   | 23.4 | 56.7 |
| <i>Drosophila melanogaster</i> (Fruit fly)     | 49.3             | 82.2 | 51.9           | 48.1   | 3568   | 39.7 | 12.2 | 7.82 | 40.3 | 80   |
| <i>Strongylocentrotus purpur.</i> (Sea urchin) | 45.1             | 58.7 | 54.1           | 45.9   | 3953   | 33.5 | 20.6 | 19.3 | 26.7 | 60.2 |
| <i>Caenorhabditis elegans</i> (Nematode)       | 46.3             | 76.2 | 51.4           | 48.6   | 2889   | 35.8 | 15.6 | 8.69 | 39.9 | 75.7 |
| <i>Metridium senile</i> (Sea anemone)          | 48.2             | 61.9 | 56.9           | 43.1   | 3412   | 32.1 | 24.8 | 17.4 | 25.6 | 57.7 |
| <i>Saccharomyces cerevi.</i> (Baker's yeast)   | 51.3             | 82.9 | 54             | 46     | 8410   | 40.4 | 13.7 | 9.82 | 36.1 | 76.5 |
| <i>Dictyostelium discoideum</i> (Slime mold)   | 60.5             | 72.6 | 57.9           | 42.1   | 6444   | 36   | 21.8 | 13.8 | 28.3 | 64.3 |
| <i>Chondrus Crispus</i> (Irish moss)           | 52.2             | 72.1 | 54.6           | 45.4   | 6280   | 36.2 | 18.3 | 13.9 | 31.6 | 67.8 |
| <i>Porphyra purpurea</i> (Red algae)           | 53               | 66.5 | 55.4           | 44.6   | 10769  | 35   | 20.4 | 16.1 | 28.5 | 63.5 |
| <i>Marchantia polymorpha</i> (Liverwort)       | 49.9             | 57.6 | 54.5           | 45.5   | 11202  | 28.5 | 26   | 21.6 | 23.8 | 52.3 |
| <i>Arabidopsis thaliana</i> (Thale cress)      | 50.2             | 55.2 | 50.9           | 49.1   | 51413  | 26.8 | 24   | 22.7 | 26.4 | 53.3 |
| <i>Chlamydomonas reinhardtii</i> (Grn algae)   | 50.5             | 54.8 | 53.6           | 46.4   | 3837   | 29.5 | 24.1 | 21.3 | 25.1 | 54.7 |
| <i>Pedinomonas minor</i> (Green algae)         | 44.1             | 77.8 | 51.1           | 48.9   | 3969   | 36.4 | 14.7 | 10.3 | 38.6 | 75   |
| <i>Physarum polycephalum</i> (Slime mold)      | 51.3             | 74.1 |                |        |        |      |      |      |      |      |
| <i>Schizosacc. Pombe</i> (Fission yeast)       | 49.5             | 69.9 | 52.7           | 47.3   | 6107   | 33.5 | 19.3 | 14.8 | 32.5 | 66   |
| <i>Reclinomonas Americana</i> (Protozoan)      | 51.5             | 73.9 | 55.1           | 44.9   | 7246   | 30.9 | 24.1 | 17.4 | 27.6 | 58.5 |
| <i>Plasmodium falciparum</i> (Malaria)         | 48.3             | 68.4 |                |        |        |      |      |      |      |      |
| <i>Polysphondylium pallidum</i> (Slime mold)   | 55.9             | 77.2 | 57.4           | 42.6   | 6267   | 37.3 | 20.2 | 12.4 | 30.1 | 67.4 |
|                                                | Soluble Proteins |      | Protein-Coding |        |        |      |      |      |      |      |
|                                                |                  |      | %Pur           | %Pyrim | Length | %A   | %G   | %C   | %T   | %AT  |
| <i>Homo sapiens</i> (Human)                    | no               |      | 42             | 58     | 11389  | 28.9 | 13.1 | 31.9 | 26.1 | 55   |
| <i>Mus musculus</i> (Mouse)                    | no               |      | 44.8           | 55.2   | 11403  | 32.6 | 12.2 | 25.1 | 30.1 | 62.7 |
| <i>Gallus gallus</i> (Chicken)                 | no               |      | 41.6           | 58.4   | 11396  | 28.3 | 13.4 | 33.6 | 24.8 | 53.1 |
| <i>Alligator mississippiensis</i> (Alligator)  | no               |      | 42.6           | 57.4   | 11398  | 29.1 | 13.4 | 30   | 27.4 | 56.5 |
| <i>Xenopus laevis</i> (African clawed frog)    | no               |      | 44             | 56     | 11375  | 30.6 | 13.4 | 23.8 | 32.2 | 62.8 |
| <i>Danio rerio</i> (Zebrafish)                 | no               |      | 45.3           | 54.7   | 11409  | 29.8 | 15.5 | 23.8 | 30.9 | 60.7 |
| <i>Drosophila melanogaster</i> (Fruit fly)     | no               |      | 44.4           | 55.6   | 11181  | 32.4 | 11.9 | 10.8 | 44.8 | 77.2 |
| <i>Strongylocentrotus purpur.</i> (Sea urchin) | no               |      | 44.1           | 55.9   | 11507  | 26.1 | 18   | 23.5 | 32.4 | 58.5 |
| <i>Caenorhabditis elegans</i> (Nematode)       | no               |      | 44.8           | 55.2   | 10299  | 29.6 | 15.3 | 9.22 | 45.9 | 75.5 |
| <i>Metridium senile</i> (Sea anemone)          | 1                |      | 45.6           | 54.4   | 12600  | 25.1 | 20.4 | 16.9 | 37.6 | 62.7 |
| <i>Saccharomyces cerevi.</i> (Baker's yeast)   | yes              |      | 51.4           | 48.6   | 24429  | 38.5 | 12.8 | 9.94 | 38.7 | 77.2 |
| <i>Dictyostelium discoideum</i> (Slime mold)   | yes              |      | 60.8           | 39.2   | 40053  | 44.5 | 16.2 | 9.73 | 29.5 | 74   |
| <i>Chondrus Crispus</i> (Irish moss)           | yes              |      | 44.5           | 55.5   | 18390  | 30.9 | 13.5 | 13.6 | 41.9 | 72.9 |
| <i>Porphyra purpurea</i> (Red algae)           | yes              |      | 49.4           | 50.6   | 25917  | 32.8 | 16.6 | 16.6 | 34   | 66.9 |
| <i>Marchantia polymorpha</i> (Liverwort)       | yes              |      | 50.5           | 49.5   | 68999  | 29.2 | 21.3 | 19.2 | 30.3 | 59.4 |
| <i>Arabidopsis thaliana</i> (Thale cress)      | yes              |      | 48.3           | 51.7   | 68940  | 26.3 | 22   | 22.2 | 29.6 | 55.9 |
| <i>Chlamydomonas reinhardtii</i> (Grn algae)   | 1                |      | 42.8           | 57.2   | 9261   | 19.9 | 22.9 | 22.1 | 35.1 | 55   |
| <i>Pedinomonas minor</i> (Green algae)         | no               |      | 39.5           | 60.5   | 10398  | 26.3 | 13.2 | 9.71 | 50.8 | 77.1 |
| <i>Physarum polycephalum</i> (Slime mold)      | yes              |      | 52             | 48     | 21039  | 40.3 | 11.7 | 12.2 | 35.7 | 76.1 |
| <i>Schizosacc. Pombe</i> (Fission yeast)       | yes              |      | 48.4           | 51.6   | 9907   | 33.5 | 14.9 | 14.4 | 37.2 | 70.7 |
| <i>Reclinomonas Americana</i> (Protozoan)      | yes              |      | 51.6           | 48.4   | 55920  | 37.5 | 14.1 | 11.2 | 37.1 | 74.6 |
| <i>Plasmodium falciparum</i> (Malaria)         | no               |      | 45.2           | 54.8   | 3510   | 31.1 | 14   | 13.5 | 41.3 | 72.4 |
| <i>Polysphondylium pallidum</i> (Slime mold)   | yes              |      | 55.4           | 44.6   | 38490  | 41.7 | 13.6 | 7.97 | 36.7 | 78.4 |

**Table S1.** Percent purine of the entire mitochondrial genome (+ strand) of selected species and individual base composition in just the protein-coding or just the RNA-coding (both tRNA and rRNA) sections.

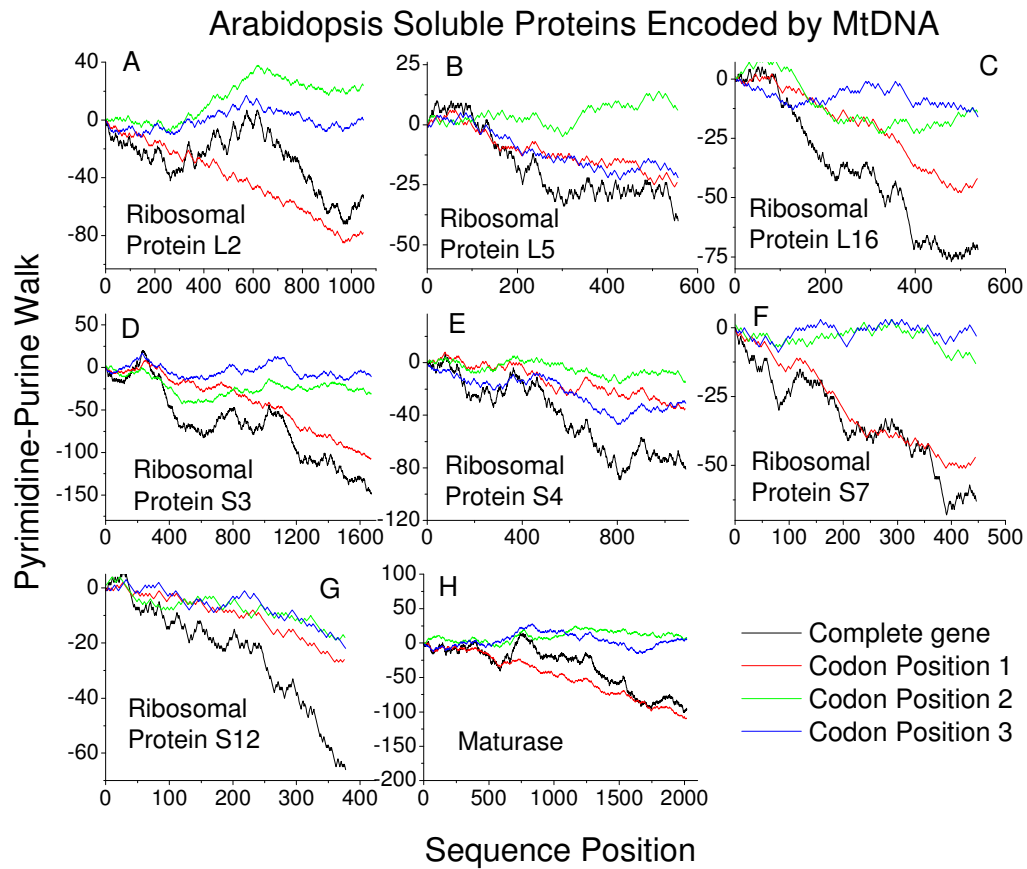

**Figure S1** The pyrimidine-purine walk of each codon position of eight soluble mitochondrial-encoded protein transcripts from *Arabidopsis thaliana*.

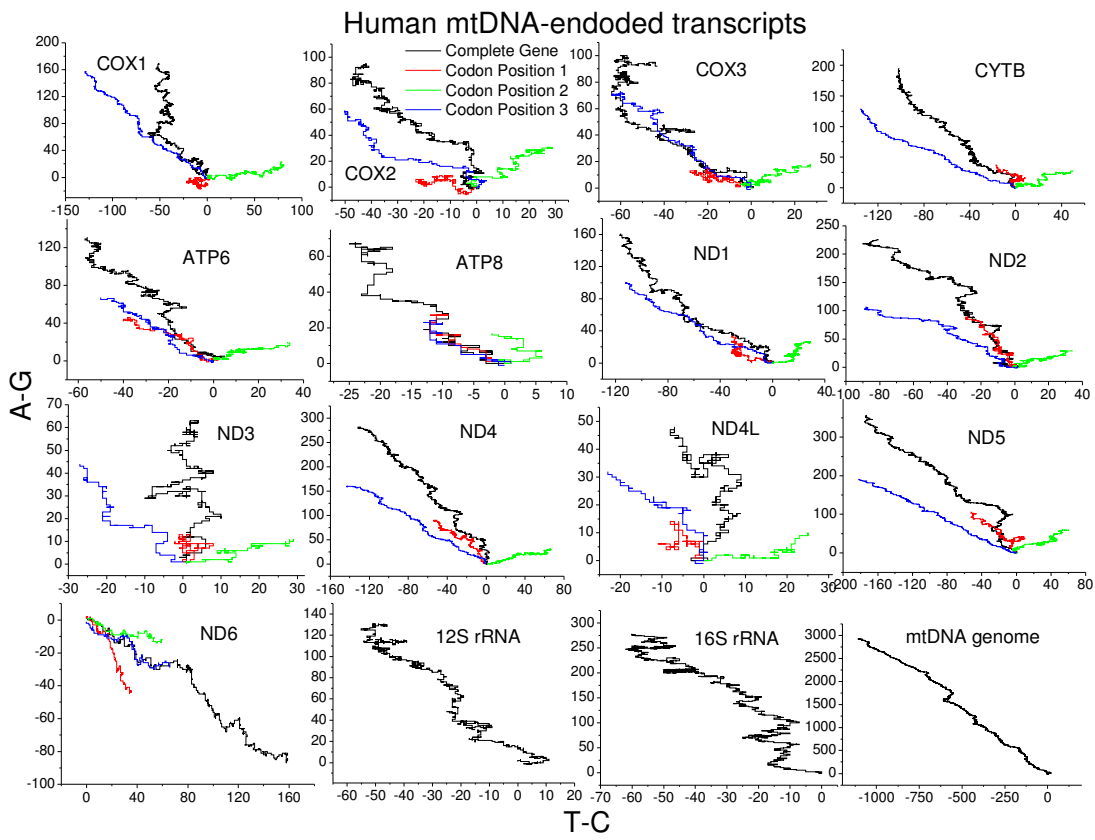

**Figure S2** The 2-dimensional A-G and T-C walks of human mtDNA-encoded transcripts.

### MtDNA intron-containing transcripts

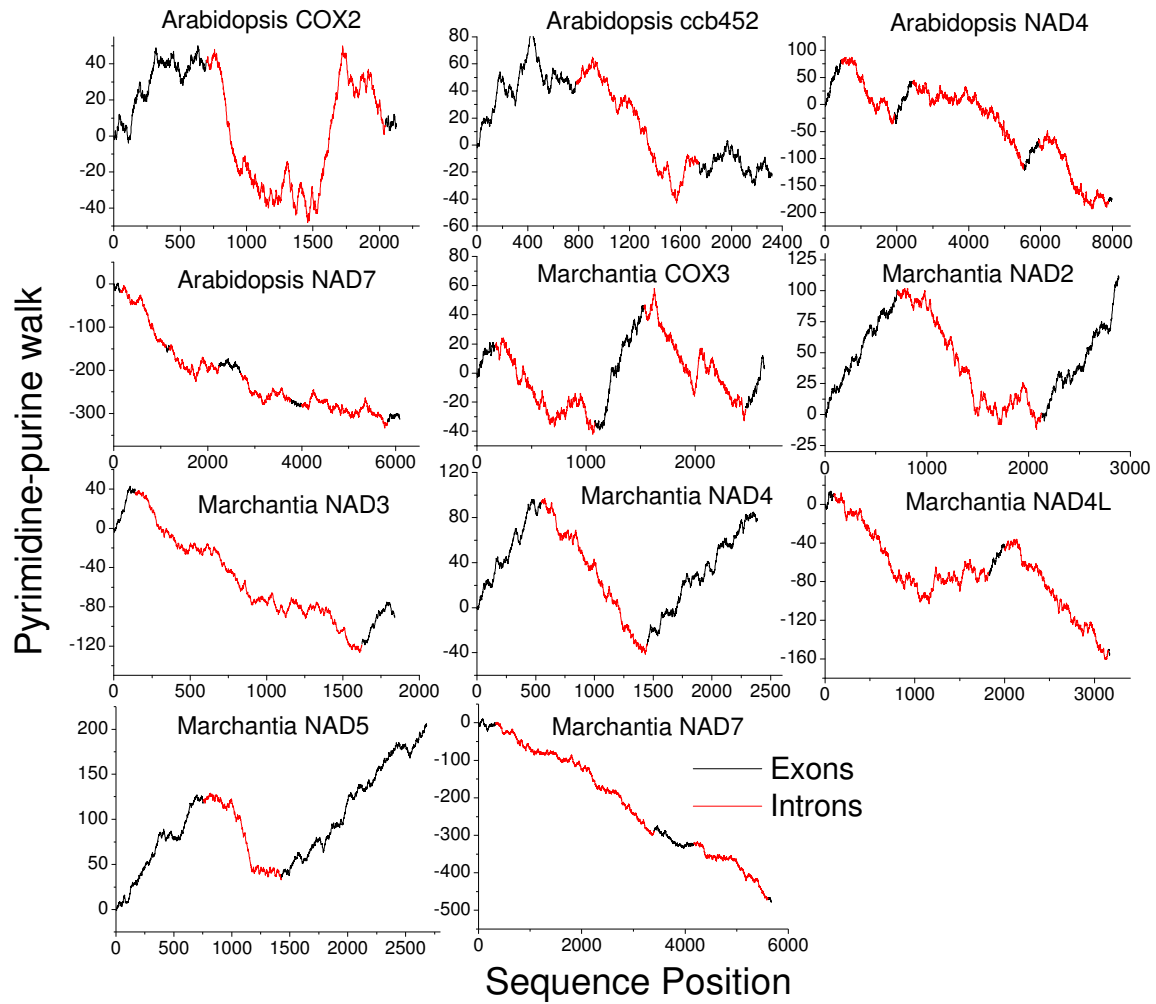

**Figure S3** Pyrimidine-purine walks of unspliced mitochondrial-encoded transcripts from *Arabidopsis thaliana* and *Marchantia polymorpha*. The introns in these transcripts do not encode known proteins.
